# Supplementary material
Source: PubMed Central journal article supplement (PMC6421990)
Supplement: Supp_Table1.pdf [file Supp_Table1.pdf]

SUPPLEMENTARY TABLE S1. ESTIMATED MEANS AND MIXED MODEL EFFECTS IN “INSIDE THE CELL” ANALYSIS FOR PRIMARY CONTINUOUS OUTCOME AND BIASES IN ATTENTION ORIENTING TOWARD THREATS IN SUBJECTS WITH A THREAT BIAS IN THE BASELINE (N=33)

|             | Estimated means   |               |                  |               |                    |              | Mixed model effects |                |                                                                  |                              |                               |
|-------------|-------------------|---------------|------------------|---------------|--------------------|--------------|---------------------|----------------|------------------------------------------------------------------|------------------------------|-------------------------------|
|             | CT + ACT (n = 10) |               | CT + ABM (n = 7) |               | G-CBT + AC (n = 9) |              | G-CBT + ABM (n = 7) |                | Time                                                             | Group                        | Group × time                  |
|             | Bas M (SE)        | End M (SE)    | Bas M (SE)       | End M (SE)    | Bas M (SE)         | End M (SE)   | Bas M (SE)          | End M (SE)     |                                                                  |                              |                               |
| PARS        | 21.36 (1.09)      | 22.68 (2.84)  | 20.25 (1.28)     | 17.51 (3.45)  | 23.16 (1.16)       | 17.73 (2.69) | 18.60 (1.31)        | 15.62 (3.46)   | $F(1,9)=2.93$ ;<br>$p=0.121$                                     | $F(3,9)=1.23$ ;<br>$p=0.355$ | $F(3,9)=1.22$ ;<br>$p=0.359$  |
| PARS-S      | 21.69 (2.26)      | 19.64 (3.24)  | 17.11 (2.64)     | 16.31 (3.90)  | 23.34 (2.38)       | 15.56 (3.18) | 19.62 (2.70)        | 12.97 (3.97)   | <b><math>F(3,9)=9.34</math></b> ;<br><b><math>p=0.014</math></b> | $F(3,9)=0.60$ ;<br>$p=0.631$ | $F(3,9)=1.56$ ;<br>$p=0.266$  |
| Threat bias | 60.77 (15.96)     | 12.56 (29.40) | 63.91 (18.72)    | 23.12 (37.26) | 45.21 (16.83)      | 7.53 (28.03) | 37.53 (19.15)       | -59.47 (43.28) | <b><math>F(3,9)=8.68</math></b> ;<br><b><math>p=0.016</math></b> | $F(3,9)=1.11$ ;<br>$p=0.397$ | $F(3,9)=0.740$ ;<br>$p=0.785$ |

Bold indicates statistically significant results.

CT, control therapy; ACT, attention control therapy; ABM, attentional bias modification training; G-CBT, group cognitive behavior therapy; Bas, baseline; End, endpoint; M, mean; SE, standard error; PARS, Pediatric Anxiety Rating Scale score; PARS-S, number of symptoms in the PARS.
