# Supplementary material
Source: PubMed Central journal article supplement (PMC6421990)

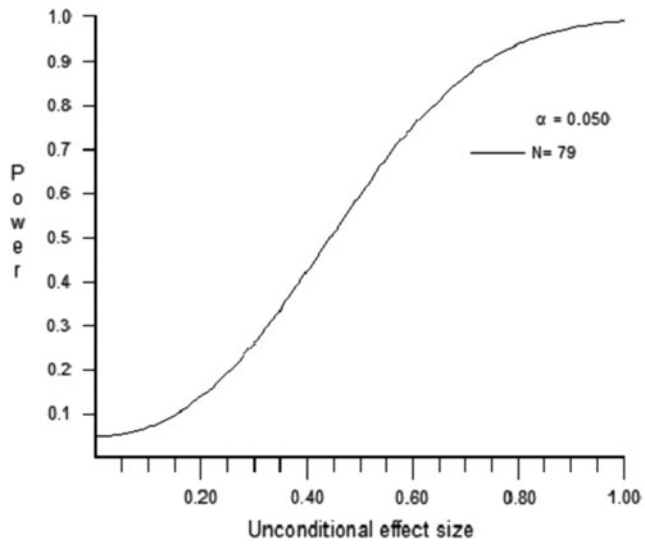

**SUPPLEMENTARY FIG. S1.** Power analysis.

Supplement: Supp_Fig1.pdf [file Supp_Fig1.pdf]
